# Supplementary material for: HPV/E7 induces chemotherapy‐mediated tumor suppression by ceramide‐dependent mitophagy
Source: PubMed Central journal article supplement (PMC5538428; doi:10.15252/emmm.201607088), 2017-06-12

Fig. 7A

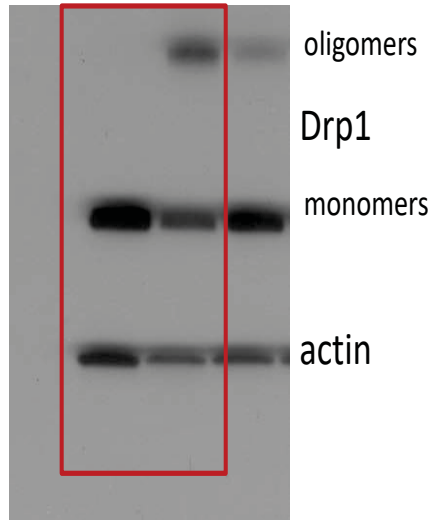

Fig. 7C

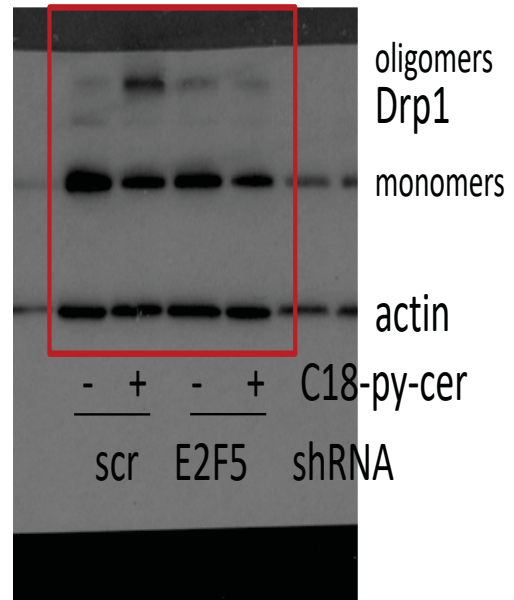

Supplement: EMMM-9-1030-s006.pdf [file EMMM-9-1030-s006.pdf]
