# Supplementary material for: HPV/E7 induces chemotherapy‐mediated tumor suppression by ceramide‐dependent mitophagy
Source: PubMed Central journal article supplement (PMC5538428; doi:10.15252/emmm.201607088), 2017-06-12

Fig. 9C-upper right panel

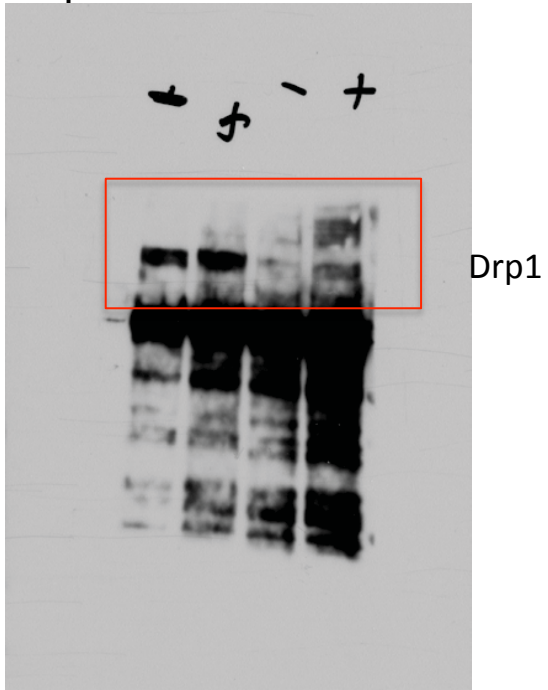

Fig. 9D-upper right panel

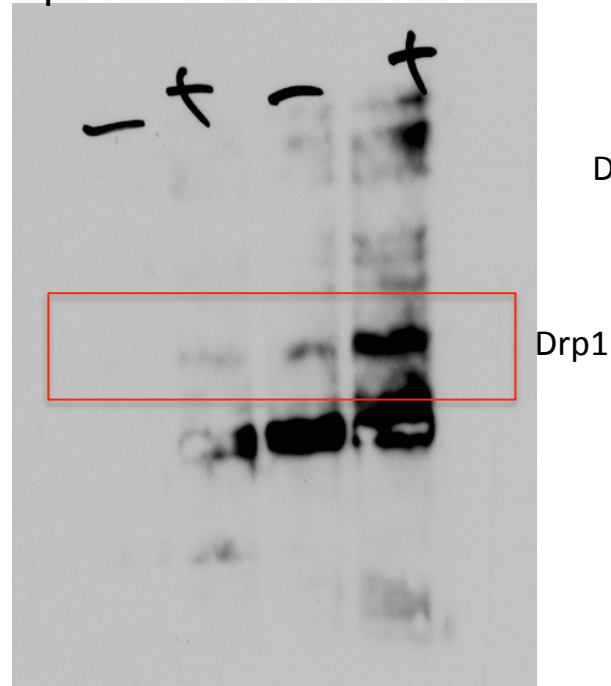

Fig. 9D-upper left panel

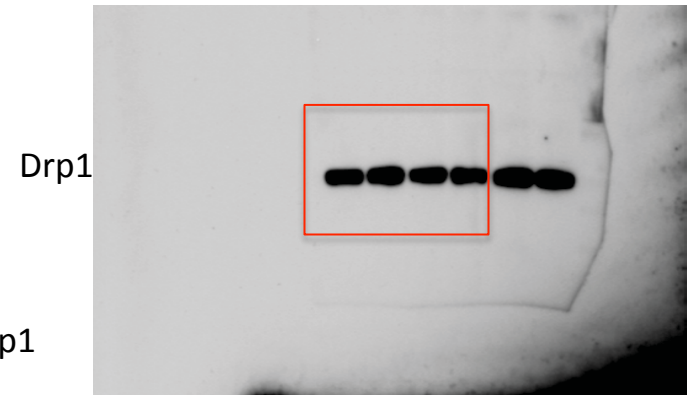

Fig. 9D-lower left panel

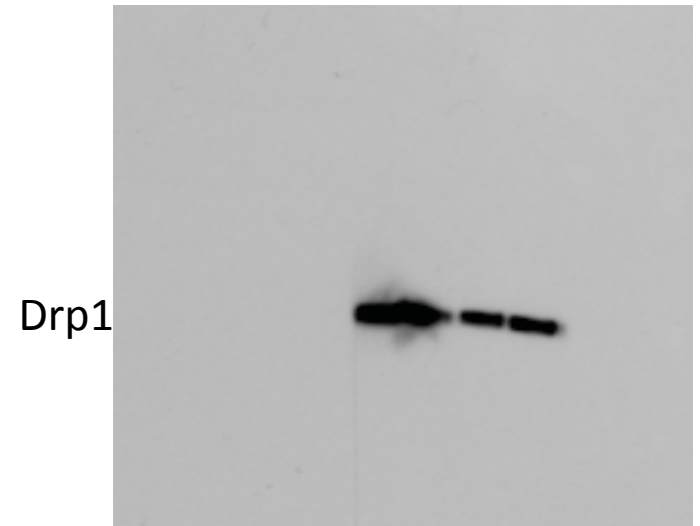

Fig. 9E

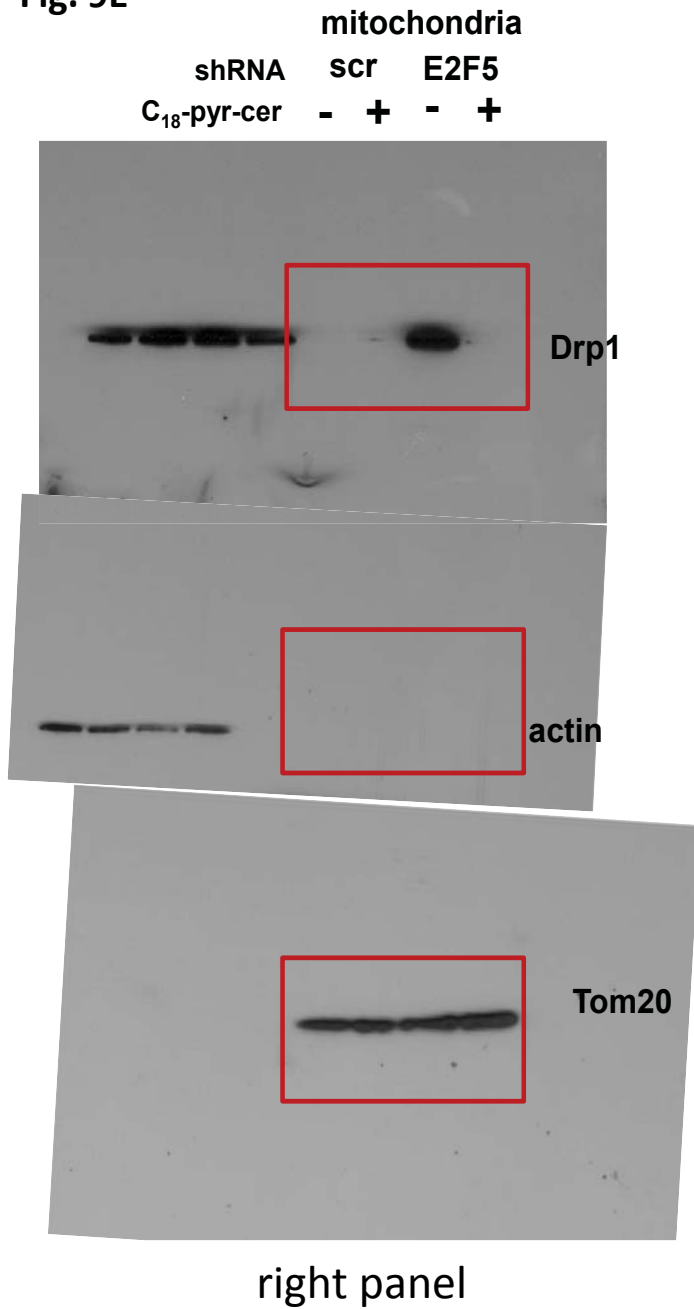

9F

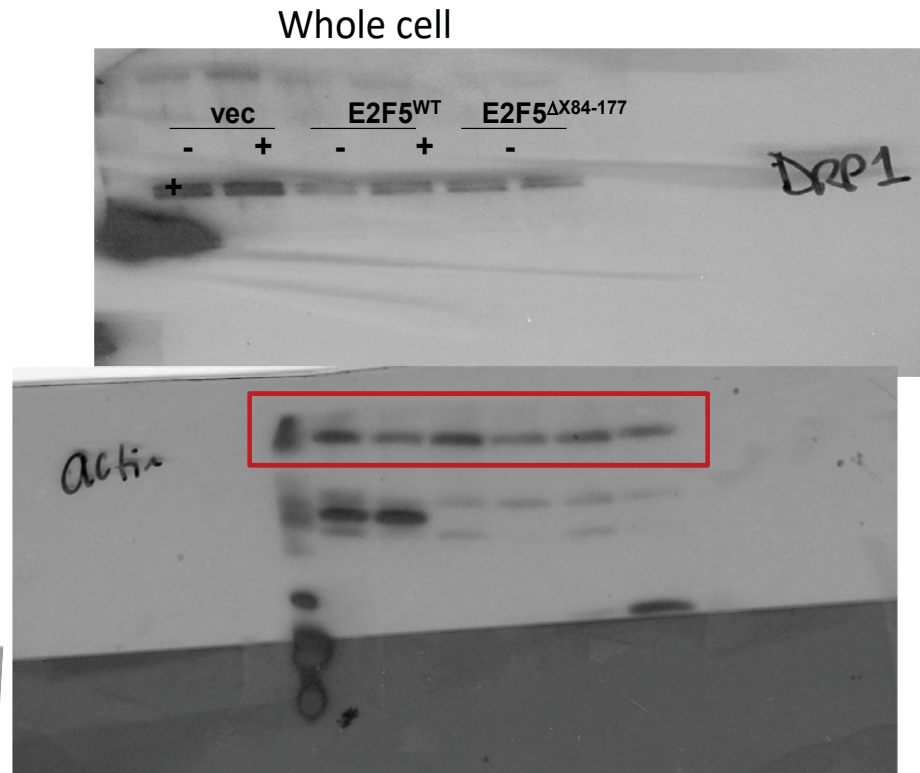

Supplement: EMMM-9-1030-s007.pdf [file EMMM-9-1030-s007.pdf]
