# Supplementary material for: HPV/E7 induces chemotherapy‐mediated tumor suppression by ceramide‐dependent mitophagy
Source: PubMed Central journal article supplement (PMC5538428; doi:10.15252/emmm.201607088), 2017-06-12
Supplement: EMMM-9-1030-s008.pdf [file EMMM-9-1030-s008.pdf]

Fig.10G

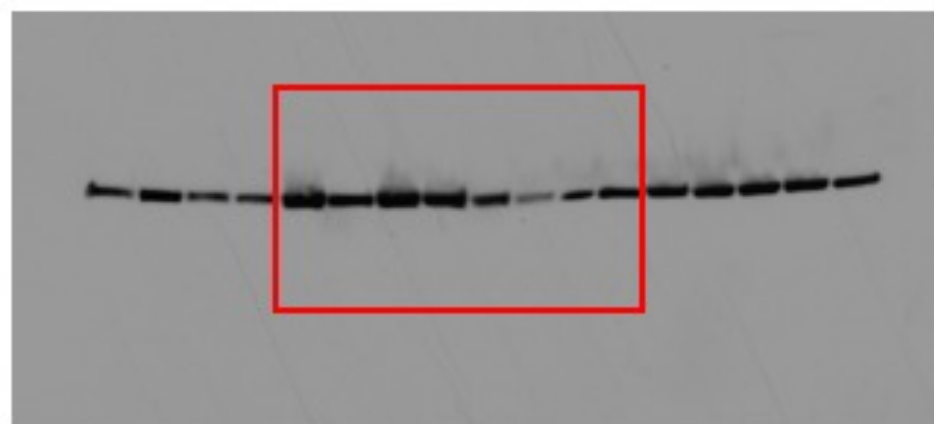

ACO2

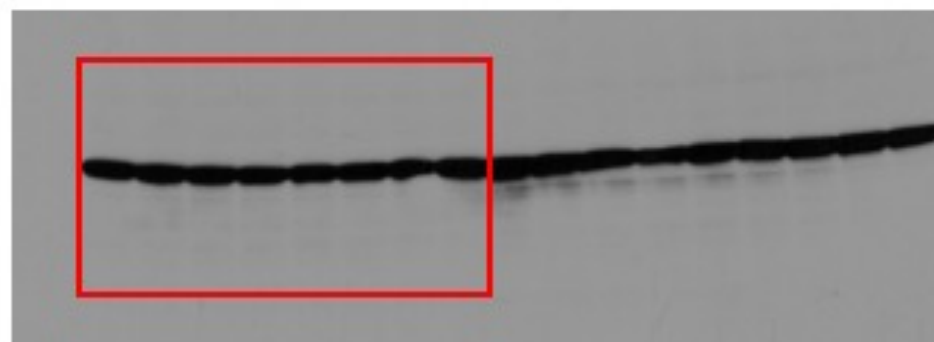

actin

Fig.10k

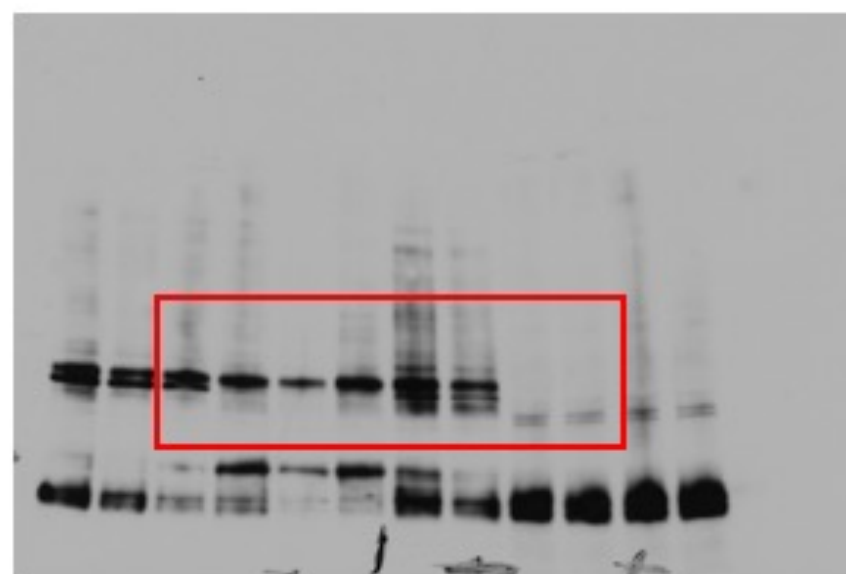

ACO2
